# Supplementary material for: A systematic evaluation of 15 actual evapotranspiration formulations within conceptual hydrological models
Source: Copernicus journal article supplement (doi:10.5194/egusphere-2025-3122), 2025-08-12
Supplement: Supplementary file 1 [file egusphere-2025-3122-supplement.pdf]

# A systematic evaluation of 15 actual evapotranspiration formulations within conceptual hydrological models - supplementary materials

Gabrielle Burns<sup>1</sup>, Keirnan Fowler<sup>1</sup>, Murray Peel<sup>1</sup>, Clare Stephens<sup>2</sup>

<sup>1</sup>Department of Infrastructure Engineering, The University of Melbourne, Parkville, VIC Australia

5 <sup>2</sup>Hawkesbury Institute for the Environment, Western Sydney University, Richmond, NSW, Australia

Correspondence to: Gabrielle Burns (gabrielle.burns@unimelb.edu.au)

## S1. Timeseries figures

### S1.1 Wombat Forest

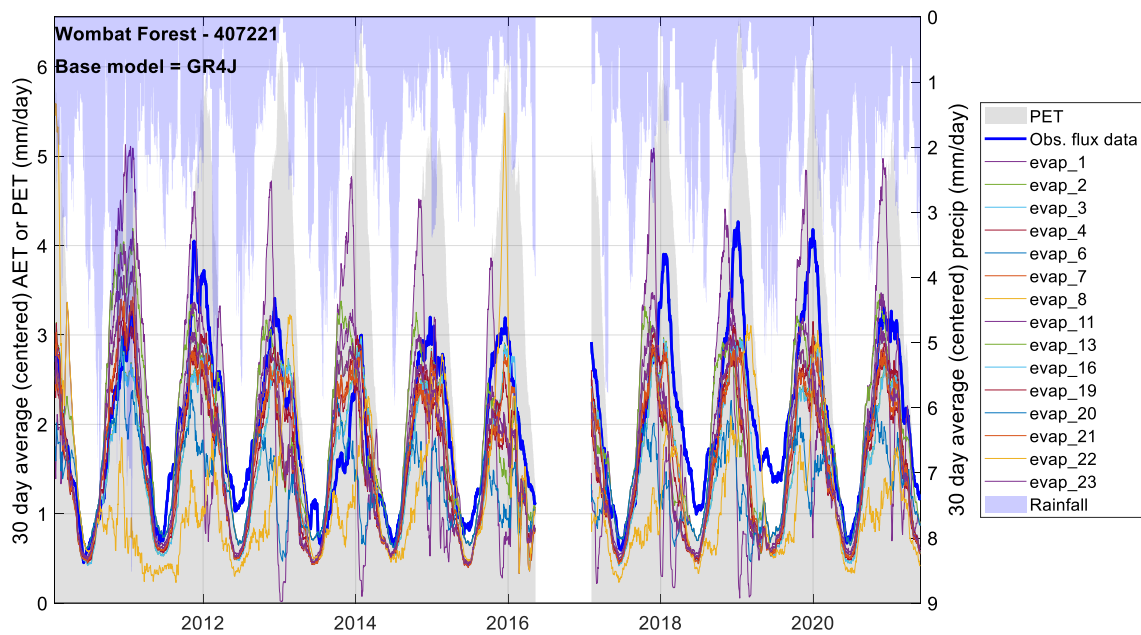

10 Figure S1.1.1 Observed flux tower data, precipitation, and PET for Wombat Forest, Victoria, Australia. 15 calibrations showing simulated AET at the site (evap\_1, evap\_2, etc.) for the base model (GR4J).

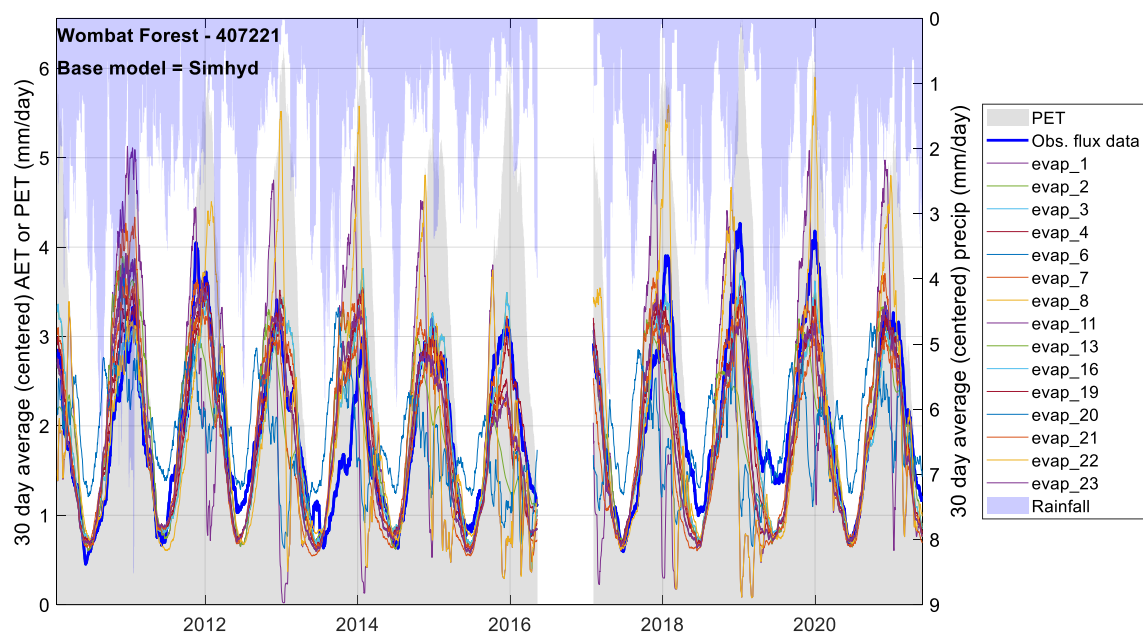

**Figure S1.1.2** Observed flux tower data, precipitation, and PET for Wombat Forest, Victoria, Australia. 15 calibrations showing simulated AET at the site (evap\_1, evap\_2, etc.) for the base model (Simhyd).

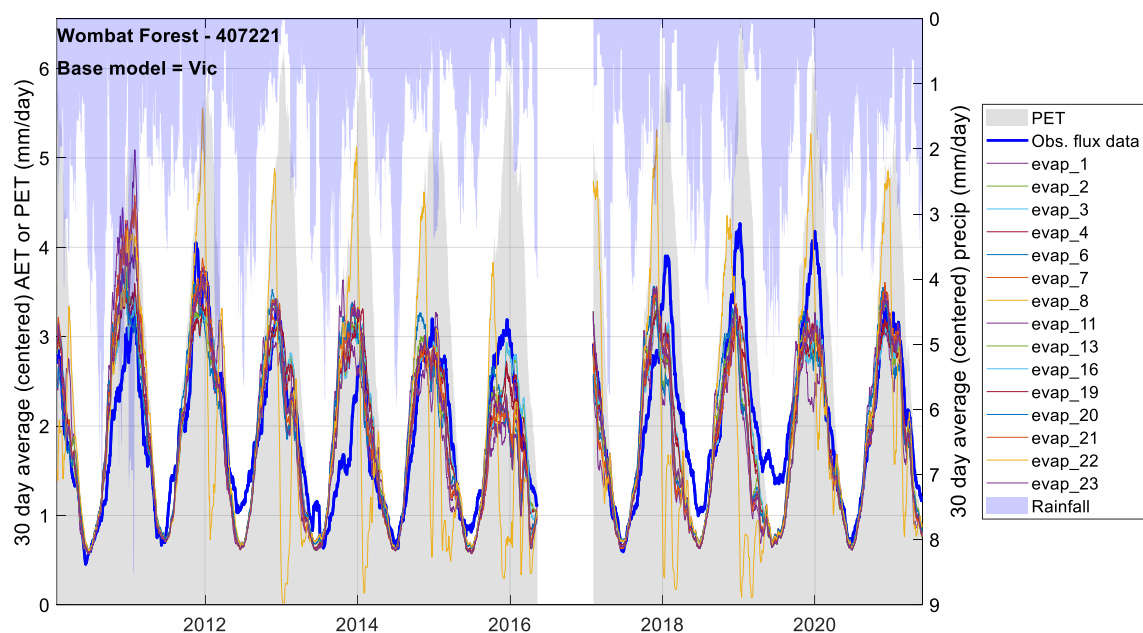

**Figure S1.1.3** Observed flux tower data, precipitation, and PET for Wombat Forest, Victoria, Australia. 15 calibrations showing simulated AET at the site (evap\_1, evap\_2, etc.) for the base model (Vic).

S1.2 Whroo

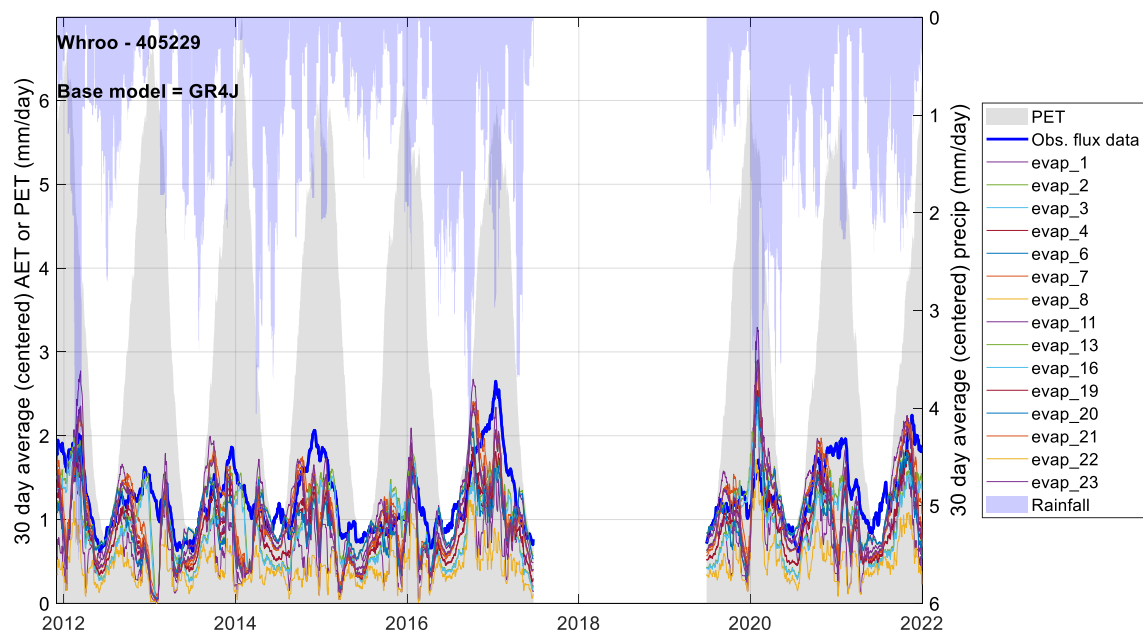

20 Figure S1.2.1 Observed flux tower data, precipitation, and PET for Whroo, Victoria, Australia. 15 calibrations showing simulated AET at the site (evap\_1, evap\_2, etc.) for the base model (GR4J).

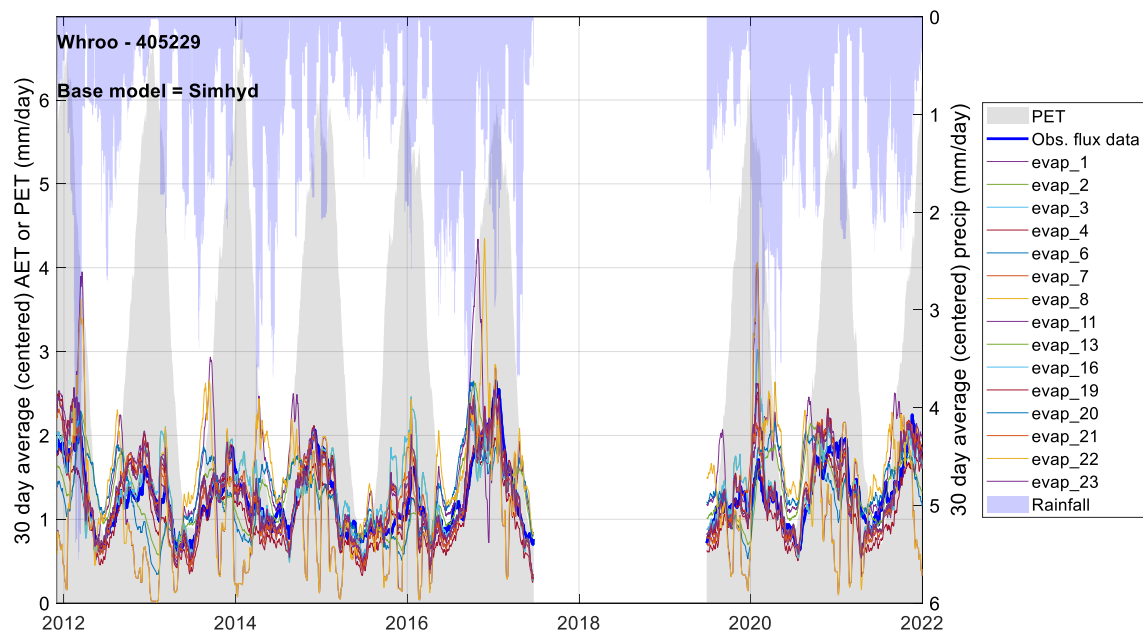

Figure S1.2.2 Observed flux tower data, precipitation, and PET for Whroo, Victoria, Australia. 15 calibrations showing simulated AET at the site (evap\_1, evap\_2, etc.) for the base model (Simhyd).

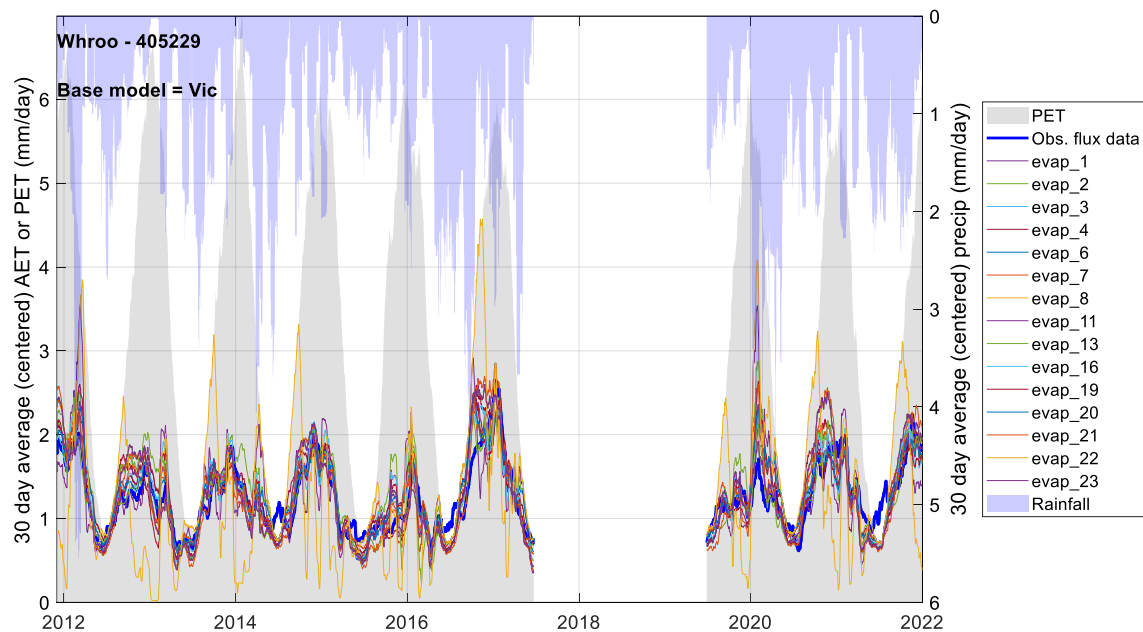

25

Figure S1.2.3 Observed flux tower data, precipitation, and PET for Whroo, Victoria, Australia. 15 calibrations showing simulated AET at the site (evap\_1, evap\_2, etc.) for the base model (Vic).



S1.3 Litchfeild

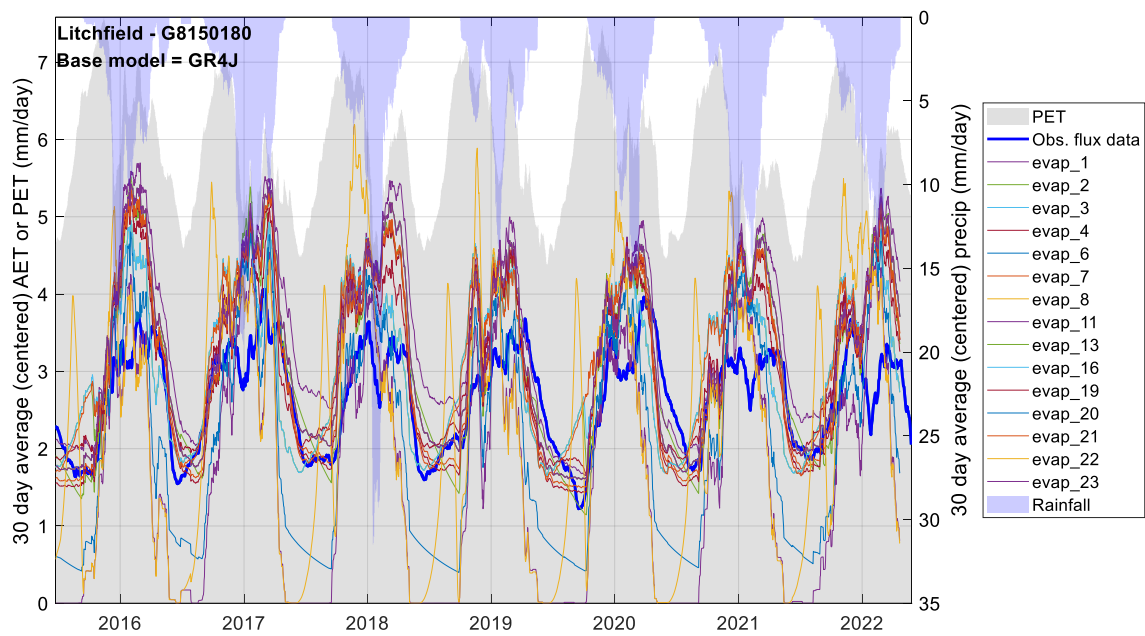

Figure S1.3.1 Observed flux tower data, precipitation, and PET for Litchfield, Northern Territory, Australia. 15 calibrations showing simulated AET at the site (evap\_1, evap\_2, etc.) for the base model (GR4J).

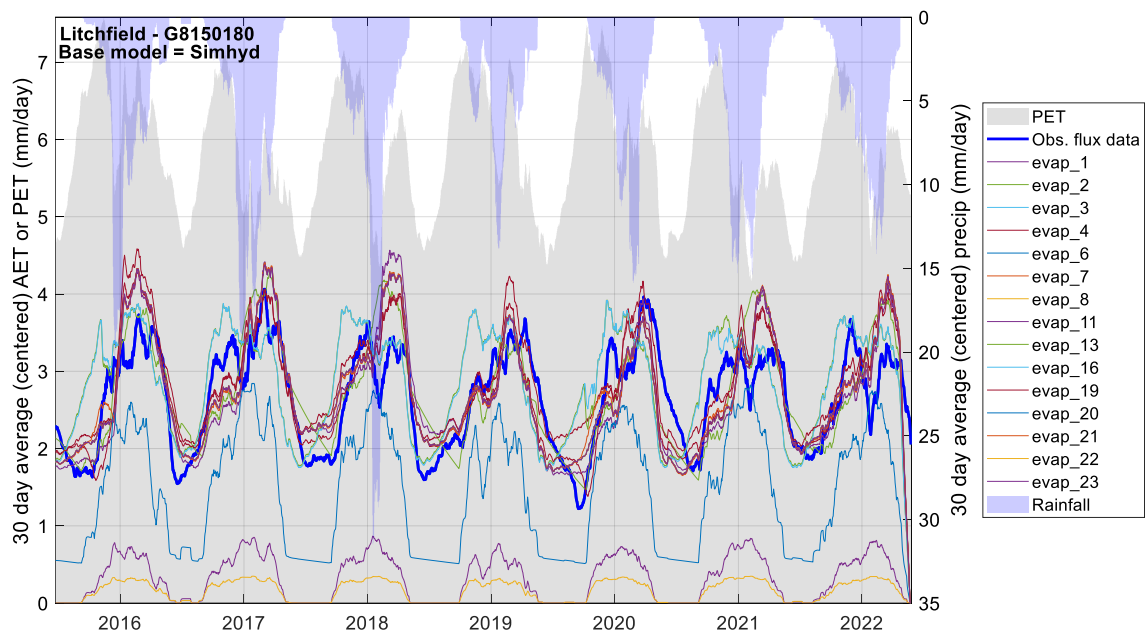

Figure S1.3.2 Observed flux tower data, precipitation, and PET for Litchfield, Northern Territory, Australia. 15 calibrations showing simulated AET at the site (evap\_1, evap\_2, etc.) for the base model (Simhyd).

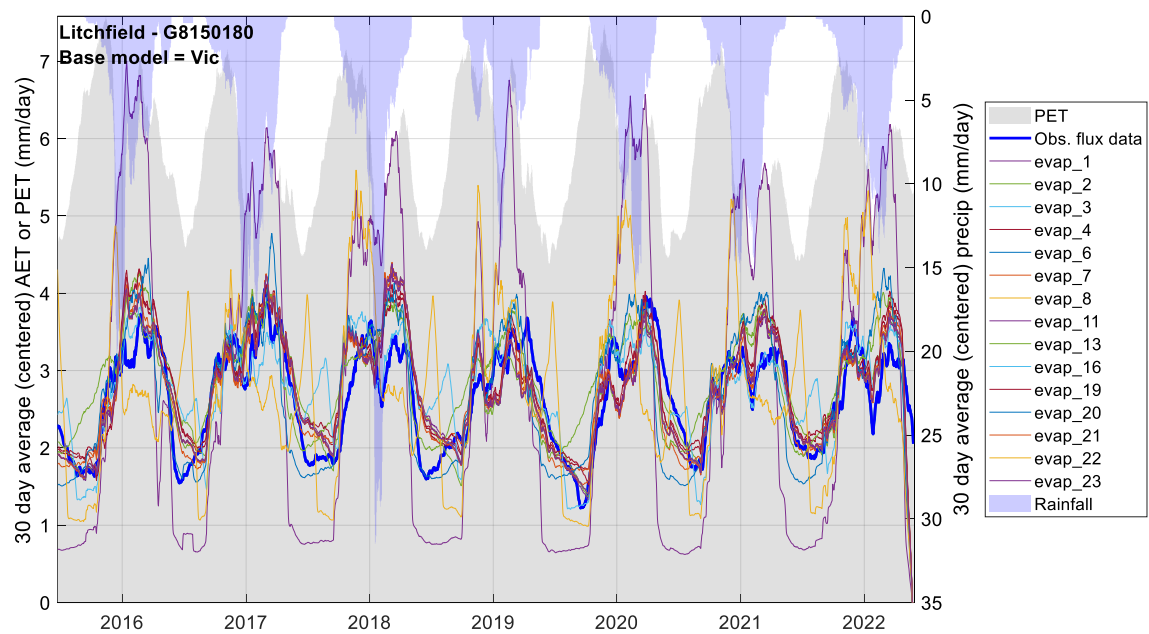

**Figure S1.3.3 Observed flux tower data, precipitation, and PET for Litchfield, Northern Territory, Australia. 15 calibrations showing simulated AET at the site (evap\_1, evap\_2, etc.) for the base model (Vic).**

S1.4 Dry River

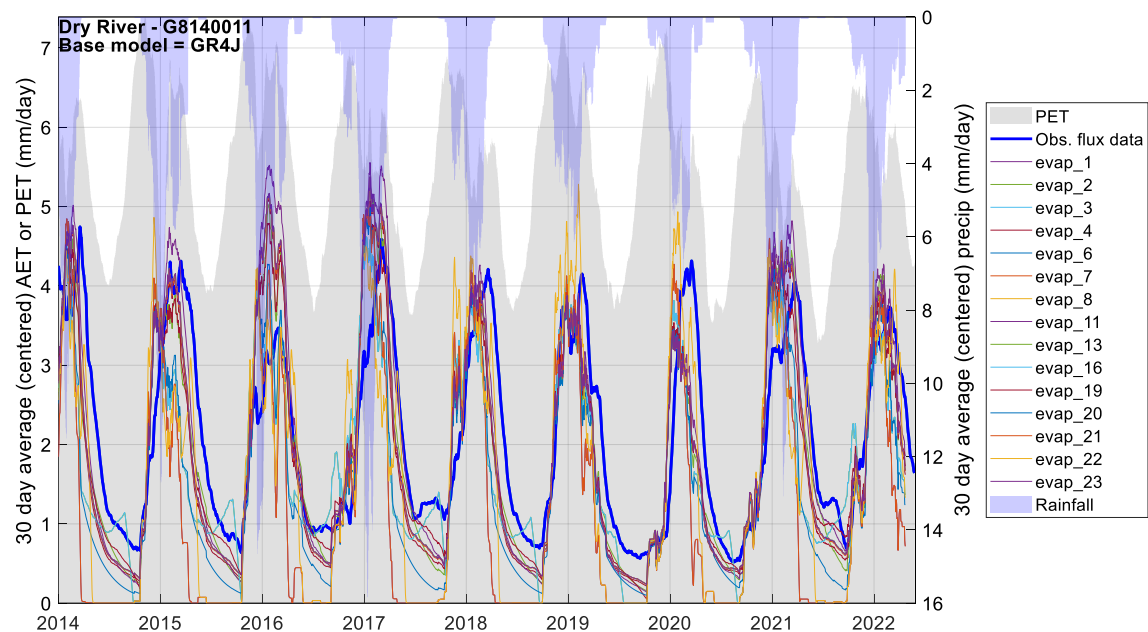

Figure S1.4.1 Observed flux tower data, precipitation, and PET for Dry River, Northern Territory, Australia. 15 calibrations showing simulated AET at the site (evap\_1, evap\_2, etc.) for the base model (GR4J).

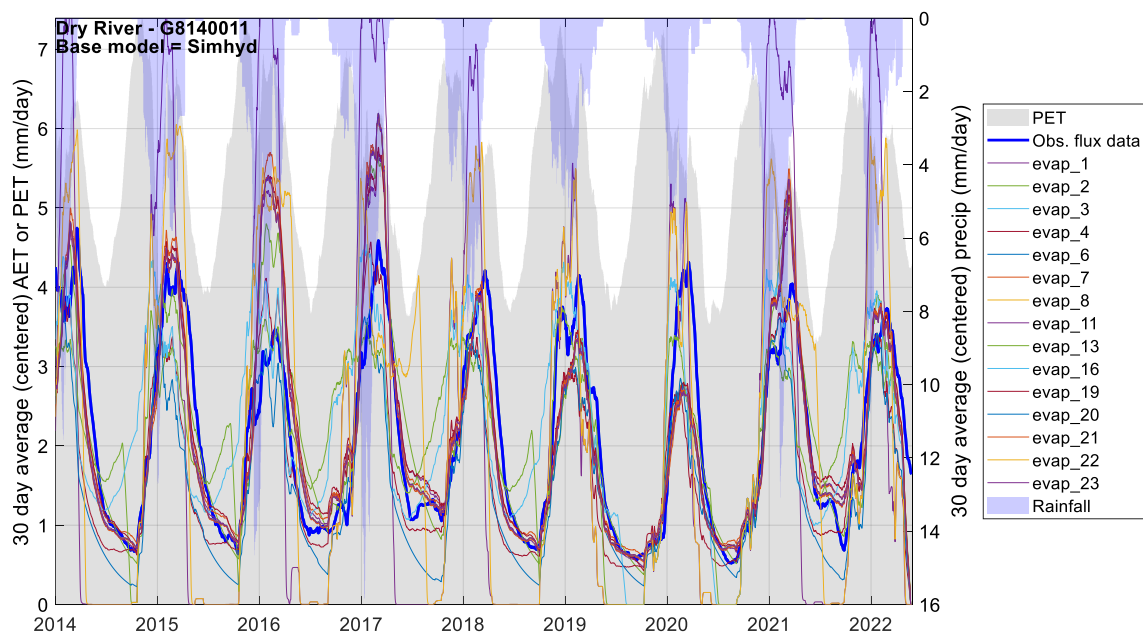

**Figure S1.4.2** Observed flux tower data, precipitation, and PET for Dry River, Northern Territory, Australia. 15 calibrations showing simulated AET at the site (evap\_1, evap\_2, etc.) for the base model (Simhyd).

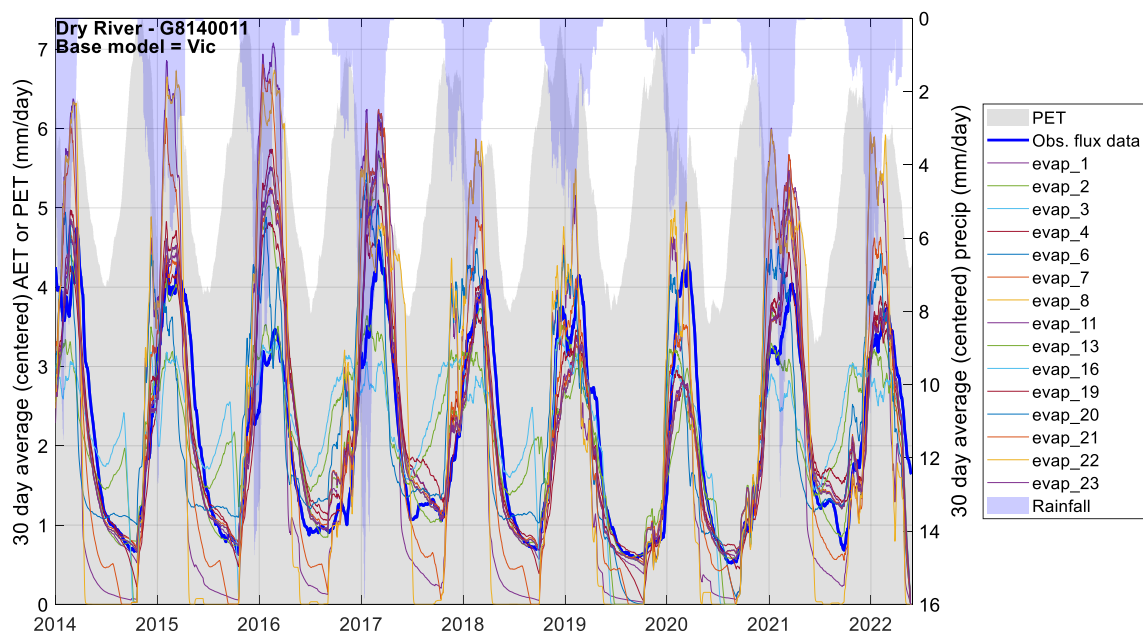

**50 Figure S1.4.3** Observed flux tower data, precipitation, and PET for Dry River, Northern Territory, Australia. 15 calibrations showing simulated AET at the site (evap\_1, evap\_2, etc.) for the base model (Vic).

S1.5 Robson Creek

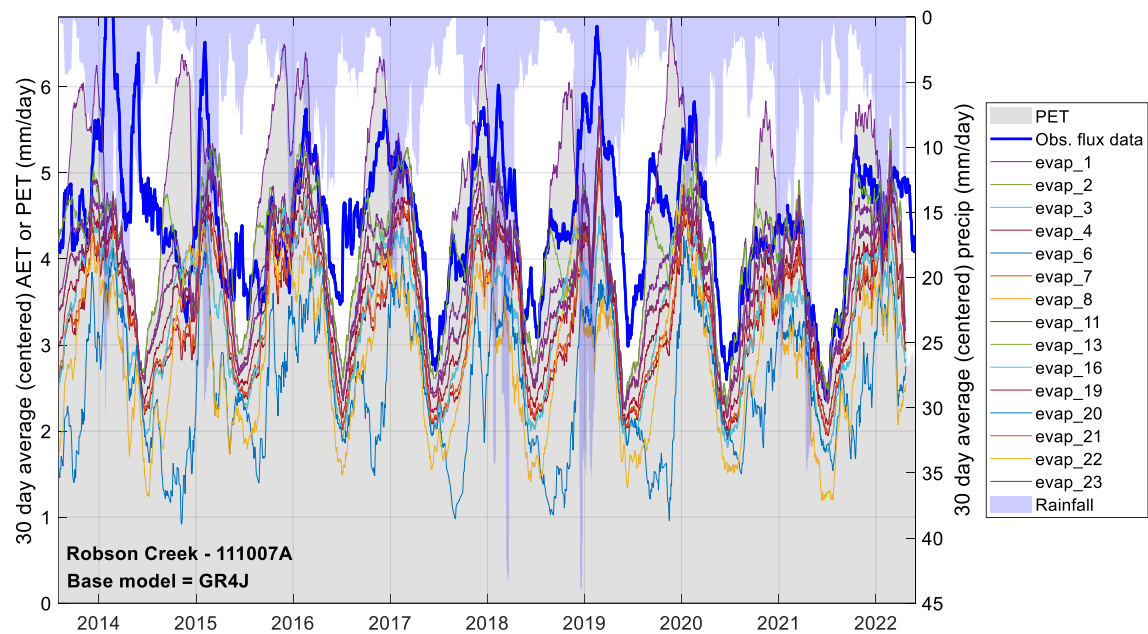

55 Figure S1.5.1 Observed flux tower data, precipitation, and PET for Robson Creek, Queensland, Australia. 15 calibrations showing simulated AET at the site (evap\_1, evap\_2, etc.) for the base model (GR4J).

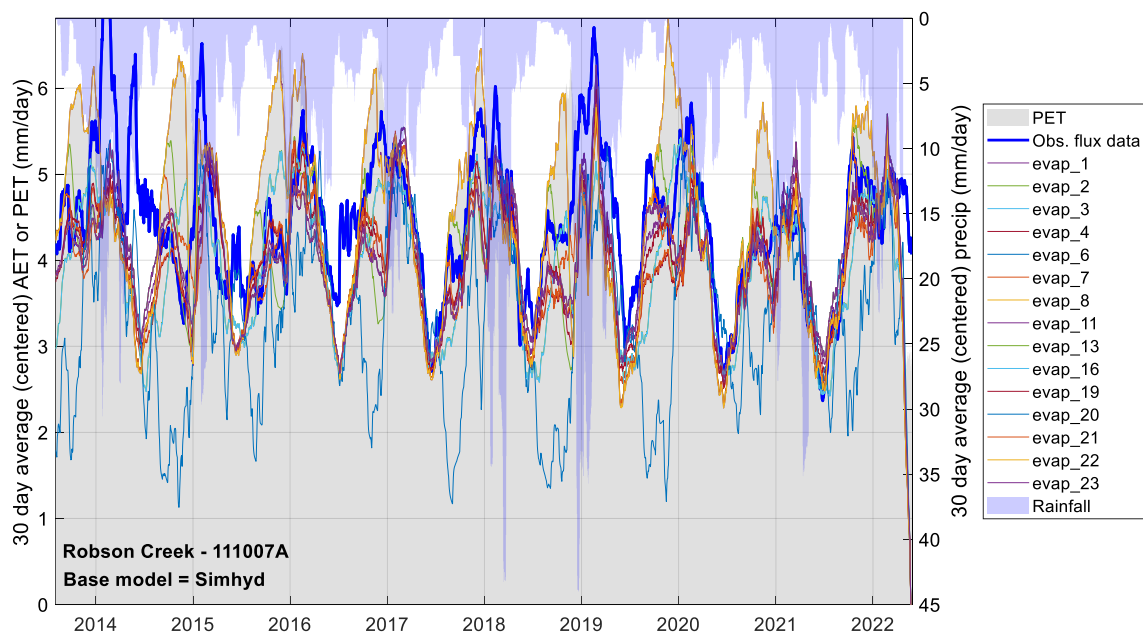

60 **Figure S1.5.2** Observed flux tower data, precipitation, and PET for Robson Creek, Queensland, Australia. 15 calibrations showing simulated AET at the site (evap\_1, evap\_2, etc.) for the base model (Simhyd).

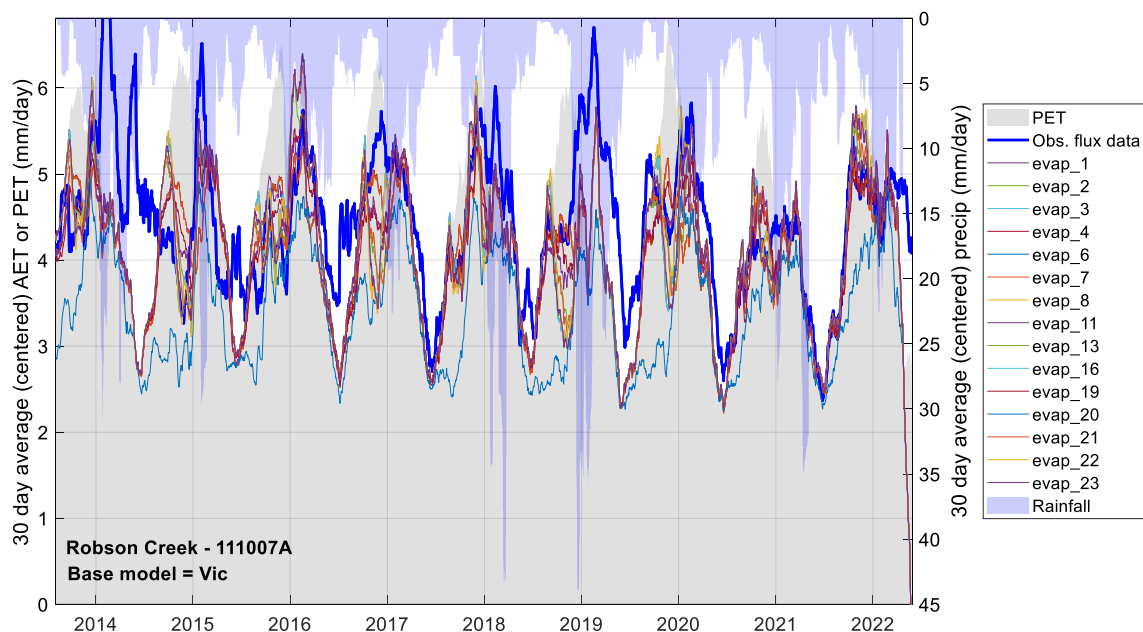

**Figure S1.5.3** Observed flux tower data, precipitation, and PET for Robson Creek, Queensland, Australia. 15 calibrations showing simulated AET at the site (evap\_1, evap\_2, etc.) for the base model (Vic).

S1.6 Gingin

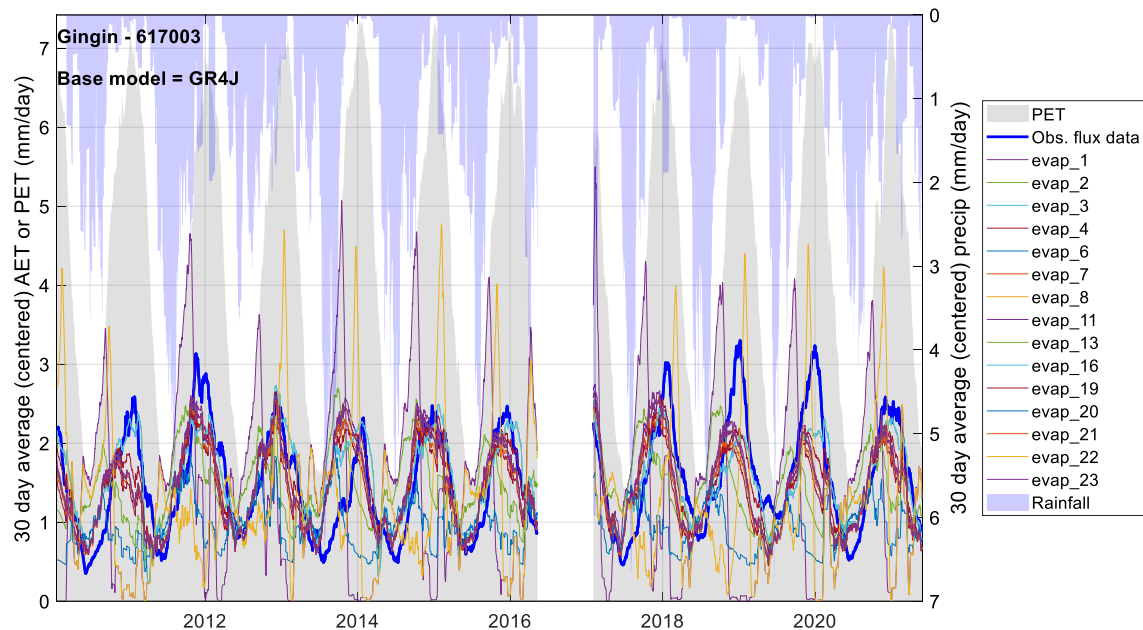

Figure S1.6.1 Observed flux tower data, precipitation, and PET for Gingin, Western Australia. 15 calibrations showing simulated AET at the site (evap\_1, evap\_2, etc.) for the base model (GR4J).



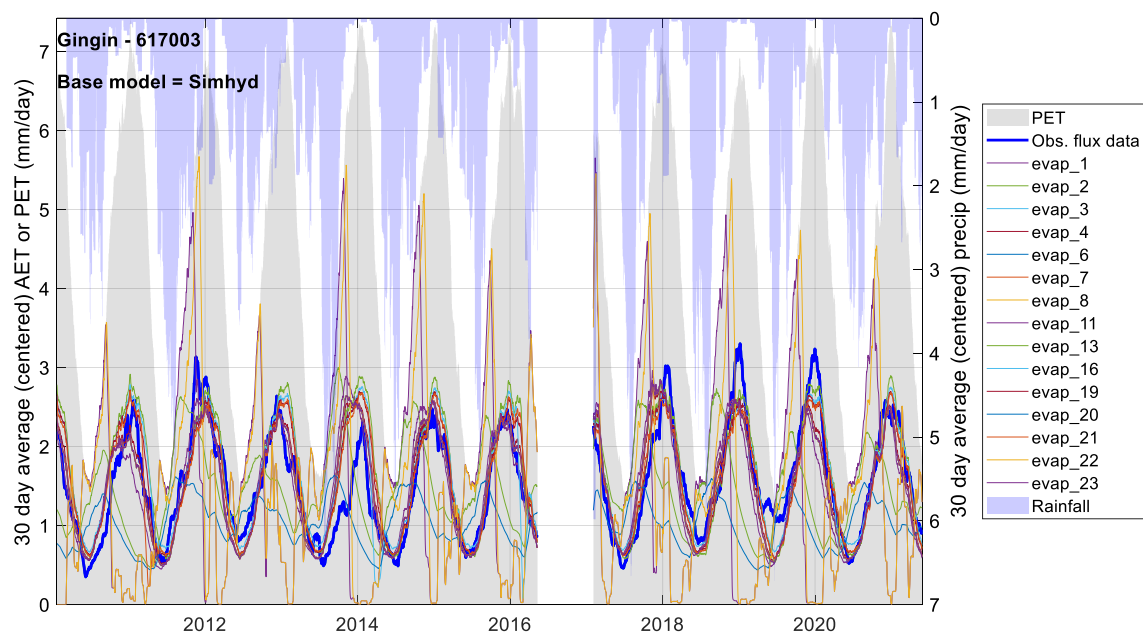

70 **Figure S1.6.2** Observed flux tower data, precipitation, and PET for Gingin, Western Australia. 15 calibrations showing simulated AET at the site (evap\_1, evap\_2, etc.) for the base model (Simhyd).

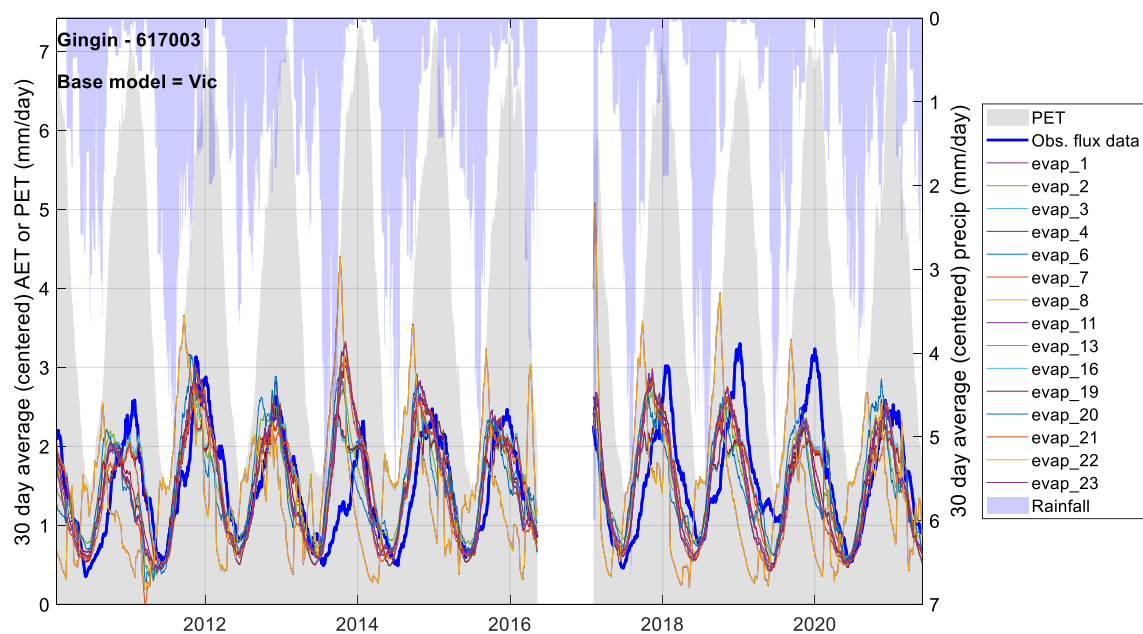

**Figure S1.6.3** Observed flux tower data, precipitation, and PET for Gingin, Western Australia. 15 calibrations showing simulated AET at the site (evap\_1, evap\_2, etc.) for the base model (Vic).



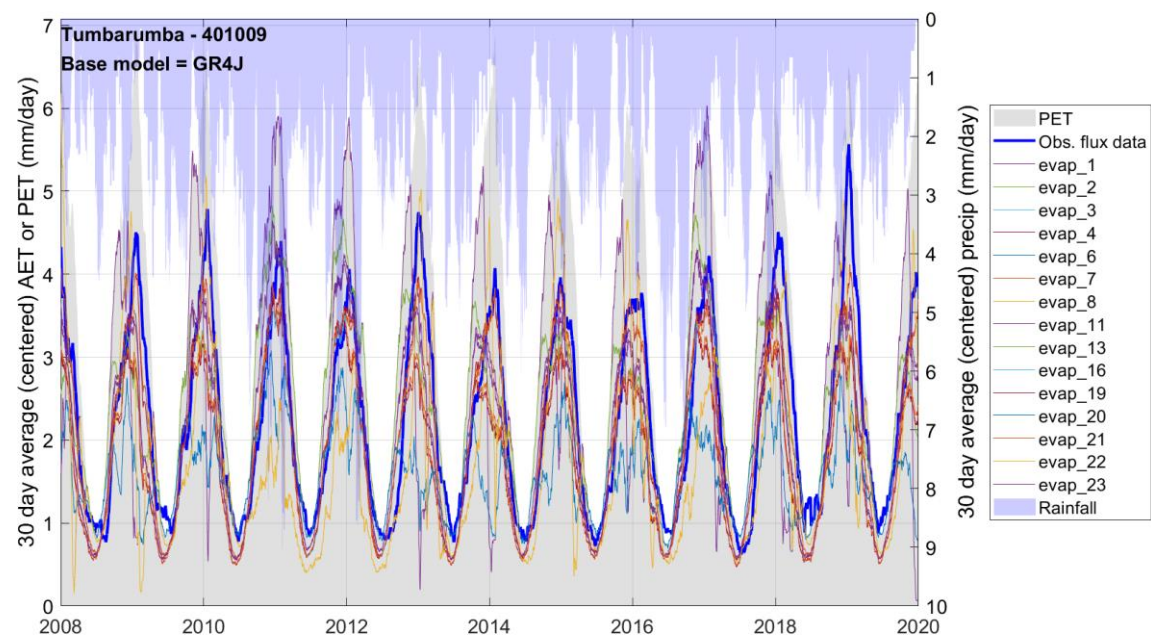

Figure S1.7.1 Observed flux tower data, precipitation, and PET for Tumbarumba, New South Wales, Australia. 15 calibrations showing simulated AET at the site (evap\_1, evap\_2, etc.) for the base model (GR4J).

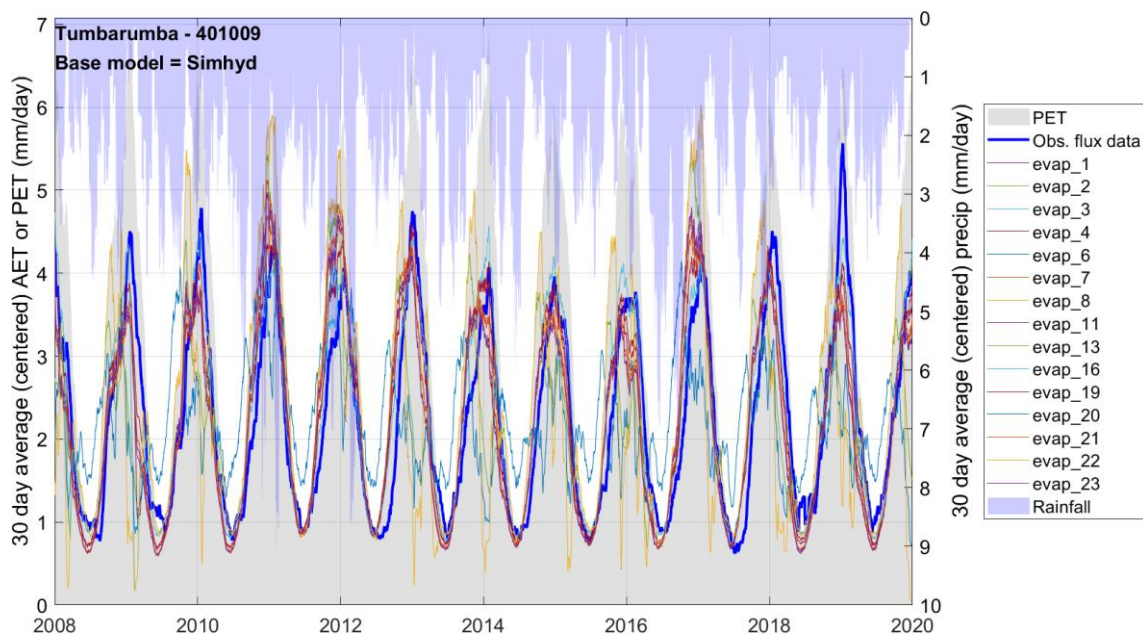

Figure S1.7.2 Observed flux tower data, precipitation, and PET for Tumbarumba, New South Wales, Australia. 15 calibrations showing simulated AET at the site (evap\_1, evap\_2, etc.) for the base model (Simhyd).

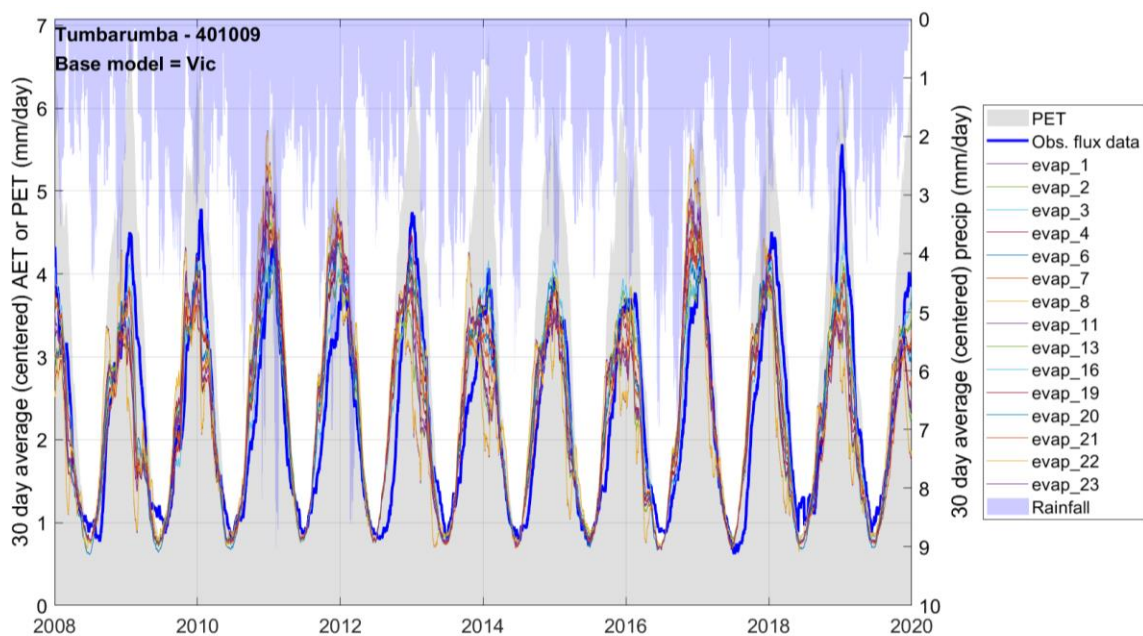

Figure S1.7.3 Observed flux tower data, precipitation, and PET for Tumbarumba, New South Wales, Australia. 15 calibrations showing simulated AET at the site (evap\_1, evap\_2, etc.) for the base model (Vic).

S2. Objective function value tables

|          | GR4J   |      |       |      |            |      |          |      |             |      |        |      |            |      |
|----------|--------|------|-------|------|------------|------|----------|------|-------------|------|--------|------|------------|------|
|          | Wombat |      | Whroo |      | Litchfield |      | DryRiver |      | RobsonCreek |      | Gingin |      | Tumbarumba |      |
| Evap eqn | OFV    | Rank | OFV   | Rank | OFV        | Rank | OFV      | Rank | OFV         | Rank | OFV    | Rank | OFV        | Rank |
| 1        | 0.49   | 14   | -0.02 | 13   | -0.48      | 15   | 0.13     | 15   | 0.61        | 13   | -0.03  | 15   | 0.51       | 15   |
| 2        | 0.72   | 12   | 0.14  | 8    | 0.51       | 12   | 0.49     | 7    | 0.68        | 10   | 0.45   | 12   | 0.76       | 12   |
| 3        | 0.76   | 9    | 0.14  | 5    | 0.54       | 8    | 0.50     | 4    | 0.70        | 3    | 0.70   | 7    | 0.83       | 8    |
| 4        | 0.74   | 11   | 0.15  | 2    | 0.52       | 11   | 0.46     | 9    | 0.69        | 9    | 0.68   | 11   | 0.79       | 11   |
| 6        | 0.76   | 7    | 0.14  | 7    | 0.54       | 8    | 0.50     | 4    | 0.70        | 3    | 0.70   | 7    | 0.83       | 8    |
| 7        | 0.75   | 10   | -0.14 | 14   | 0.54       | 5    | 0.50     | 6    | 0.69        | 8    | 0.69   | 10   | 0.80       | 10   |
| 8        | 0.76   | 9    | 0.14  | 5    | 0.54       | 8    | 0.50     | 4    | 0.70        | 3    | 0.70   | 7    | 0.83       | 8    |
| 11       | 0.76   | 5    | 0.08  | 12   | 0.52       | 10   | 0.46     | 8    | 0.69        | 7    | 0.70   | 9    | 0.84       | 5    |
| 13       | 0.79   | 3    | 0.10  | 11   | 0.58       | 2    | 0.42     | 12   | 0.66        | 12   | 0.71   | 1    | 0.87       | 3    |
| 16       | 0.79   | 4    | 0.10  | 10   | 0.58       | 3    | 0.42     | 11   | 0.66        | 11   | 0.71   | 2    | 0.87       | 2    |
| 19       | 0.80   | 1    | 0.17  | 1    | 0.63       | 1    | 0.53     | 1    | 0.69        | 6    | 0.71   | 3    | 0.87       | 4    |
| 20       | 0.54   | 13   | 0.14  | 9    | 0.26       | 13   | 0.42     | 10   | 0.52        | 15   | 0.28   | 13   | 0.52       | 14   |
| 21       | 0.79   | 2    | 0.15  | 3    | 0.58       | 4    | 0.13     | 14   | 0.70        | 5    | 0.70   | 4    | 0.87       | 1    |
| 22       | 0.26   | 15   | -0.33 | 15   | -0.32      | 14   | 0.22     | 13   | 0.59        | 14   | 0.21   | 14   | 0.69       | 13   |
| 23       | 0.76   | 7    | 0.14  | 7    | 0.54       | 8    | 0.50     | 4    | 0.70        | 3    | 0.70   | 7    | 0.83       | 8    |

|          | Simhyd |      |       |      |            |      |          |      |             |      |        |      |            |      |
|----------|--------|------|-------|------|------------|------|----------|------|-------------|------|--------|------|------------|------|
|          | Wombat |      | Whroo |      | Litchfield |      | DryRiver |      | RobsonCreek |      | Gingin |      | Tumbarumba |      |
| Evap eqn | OFV    | Rank | OFV   | Rank | OFV        | Rank | OFV      | Rank | OFV         | Rank | OFV    | Rank | OFV        | Rank |
| 1        | 0.73   | 14   | 0.48  | 13   | -0.05      | 15   | 0.18     | 14   | 0.60        | 10   | 0.24   | 14   | 0.68       | 14   |
| 2        | 0.79   | 6    | 0.61  | 2    | 0.66       | 3    | 0.65     | 5    | 0.60        | 7    | 0.57   | 12   | 0.76       | 11   |
| 3        | 0.76   | 12   | 0.52  | 11   | 0.66       | 6    | 0.66     | 4    | 0.60        | 3    | 0.65   | 7    | 0.77       | 4    |
| 4        | 0.80   | 4    | 0.62  | 1    | 0.67       | 2    | 0.57     | 9    | 0.58        | 14   | 0.67   | 4    | 0.75       | 12   |
| 6        | 0.76   | 11   | 0.52  | 11   | 0.66       | 8    | 0.66     | 2    | 0.60        | 5    | 0.65   | 9    | 0.77       | 6    |
| 7        | 0.80   | 5    | 0.55  | 7    | 0.65       | 10   | 0.65     | 6    | 0.58        | 13   | 0.64   | 10   | 0.76       | 9    |
| 8        | 0.76   | 9    | 0.52  | 11   | 0.66       | 5    | 0.66     | 4    | 0.60        | 6    | 0.65   | 7    | 0.77       | 3    |
| 11       | 0.75   | 13   | 0.56  | 6    | 0.65       | 9    | 0.63     | 7    | 0.60        | 1    | 0.63   | 11   | 0.77       | 7    |
| 13       | 0.81   | 2    | 0.53  | 8    | 0.61       | 12   | 0.50     | 10   | 0.60        | 8    | 0.72   | 1    | 0.76       | 10   |
| 16       | 0.81   | 3    | 0.57  | 5    | 0.62       | 11   | 0.46     | 11   | 0.60        | 9    | 0.72   | 2    | 0.76       | 8    |
| 19       | 0.82   | 1    | 0.59  | 4    | 0.68       | 1    | 0.63     | 8    | 0.59        | 12   | 0.72   | 3    | 0.78       | 2    |
| 20       | 0.77   | 7    | 0.60  | 3    | 0.46       | 13   | 0.40     | 12   | 0.39        | 15   | 0.56   | 13   | 0.52       | 15   |
| 21       | 0.77   | 8    | 0.46  | 14   | 0.66       | 4    | 0.26     | 13   | 0.60        | 2    | 0.67   | 5    | 0.80       | 1    |
| 22       | 0.32   | 15   | 0.07  | 15   | 0.34       | 14   | 0.04     | 15   | 0.60        | 11   | 0.23   | 15   | 0.68       | 13   |
| 23       | 0.76   | 11   | 0.52  | 11   | 0.66       | 8    | 0.66     | 2    | 0.60        | 5    | 0.65   | 9    | 0.77       | 6    |

|          | VIC    |      |       |      |            |      |          |      |             |      |        |      |            |      |
|----------|--------|------|-------|------|------------|------|----------|------|-------------|------|--------|------|------------|------|
|          | Wombat |      | Whroo |      | Litchfield |      | DryRiver |      | RobsonCreek |      | Gingin |      | Tumbarumba |      |
| Evap eqn | OFV    | Rank | OFV   | Rank | OFV        | Rank | OFV      | Rank | OFV         | Rank | OFV    | Rank | OFV        | Rank |
| 1        | 0.49   | 14   | 0.02  | 15   | -0.57      | 15   | -0.03    | 15   | 0.58        | 14   | 0.01   | 14   | 0.53       | 14   |
| 2        | 0.70   | 12   | 0.42  | 13   | 0.62       | 10   | 0.59     | 4    | 0.65        | 12   | 0.38   | 12   | 0.69       | 12   |
| 3        | 0.74   | 9    | 0.51  | 8    | 0.64       | 6    | 0.58     | 6    | 0.65        | 11   | 0.70   | 7    | 0.74       | 10   |
| 4        | 0.81   | 1    | 0.54  | 2    | 0.65       | 2    | 0.52     | 10   | 0.66        | 5    | 0.70   | 10   | 0.80       | 2    |
| 6        | 0.74   | 11   | 0.51  | 6    | 0.64       | 8    | 0.58     | 8    | 0.65        | 9    | 0.70   | 9    | 0.74       | 8    |
| 7        | 0.77   | 4    | 0.57  | 9    | 0.64       | 4    | 0.75     | 2    | 0.66        | 4    | 0.70   | 5    | 0.78       | 3    |
| 8        | 0.74   | 9    | 0.51  | 8    | 0.64       | 6    | 0.58     | 6    | 0.65        | 11   | 0.70   | 7    | 0.74       | 10   |
| 11       | 0.74   | 7    | 0.51  | 12   | 0.63       | 9    | 0.59     | 3    | 0.66        | 2    | 0.70   | 11   | 0.76       | 6    |
| 13       | 0.75   | 5    | 0.51  | 10   | 0.61       | 11   | 0.47     | 12   | 0.65        | 6    | 0.73   | 4    | 0.76       | 5    |
| 16       | 0.75   | 6    | 0.51  | 11   | 0.60       | 12   | 0.42     | 13   | 0.65        | 7    | 0.73   | 2    | 0.76       | 4    |
| 19       | 0.77   | 2    | 0.52  | 4    | 0.67       | 1    | 0.75     | 1    | 0.68        | 1    | 0.74   | 1    | 0.81       | 1    |
| 20       | 0.43   | 15   | 0.54  | 1    | 0.22       | 14   | 0.50     | 11   | 0.43        | 15   | -0.07  | 15   | 0.37       | 15   |
| 21       | 0.77   | 3    | 0.53  | 3    | 0.64       | 3    | 0.58     | 9    | 0.66        | 3    | 0.73   | 3    | 0.74       | 11   |
| 22       | 0.56   | 13   | 0.06  | 14   | 0.27       | 13   | 0.03     | 14   | 0.58        | 13   | 0.05   | 13   | 0.53       | 13   |
| 23       | 0.74   | 11   | 0.51  | 6    | 0.64       | 8    | 0.58     | 8    | 0.65        | 9    | 0.70   | 9    | 0.74       | 8    |

S3. Litchfield calibration, GR4J cal AET only.

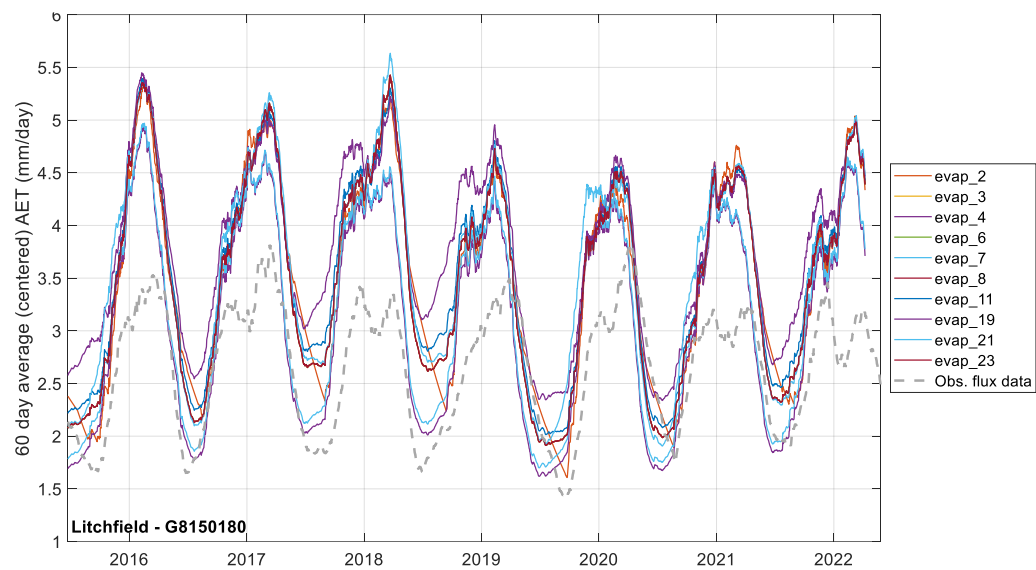

95 Figure S3.1. Modelled AET vs. observed flux tower data for the best equations (in this specific case) at Litchfield, under AET-only calibration, for GR4J only (streamflow not considered).

S4. Signature scatterplots

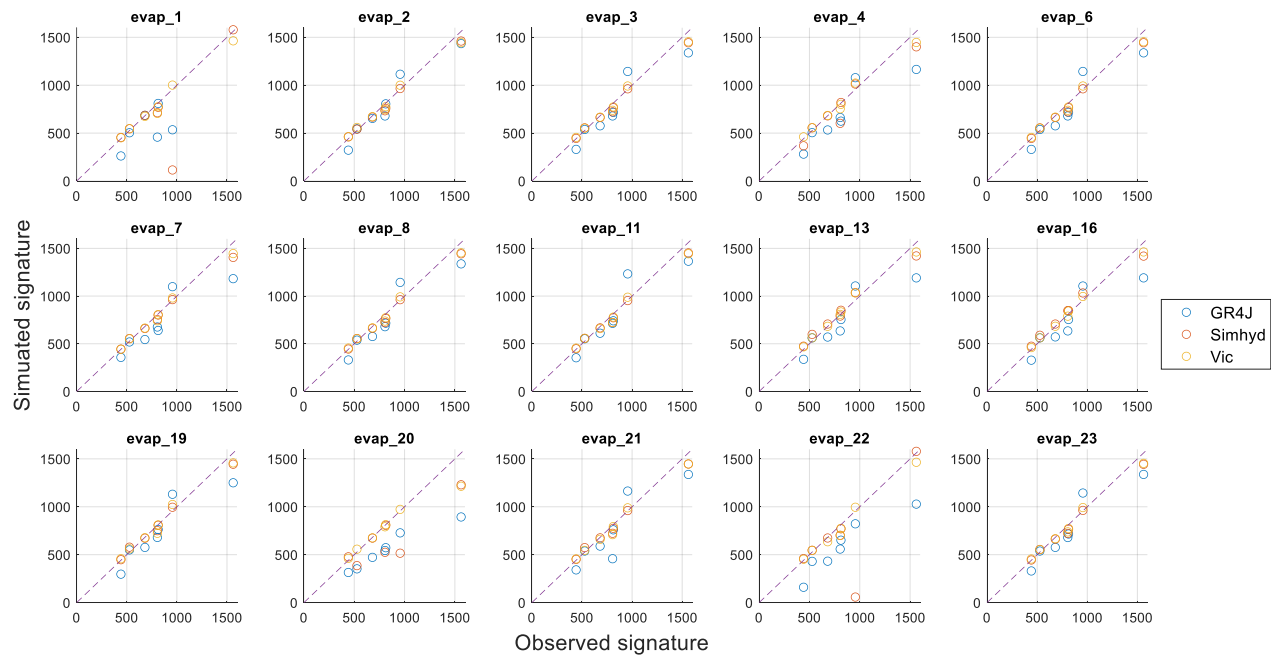

Figure S4.1. Long-term median: observed vs. simulated AET across all equations and models. Annual signature.

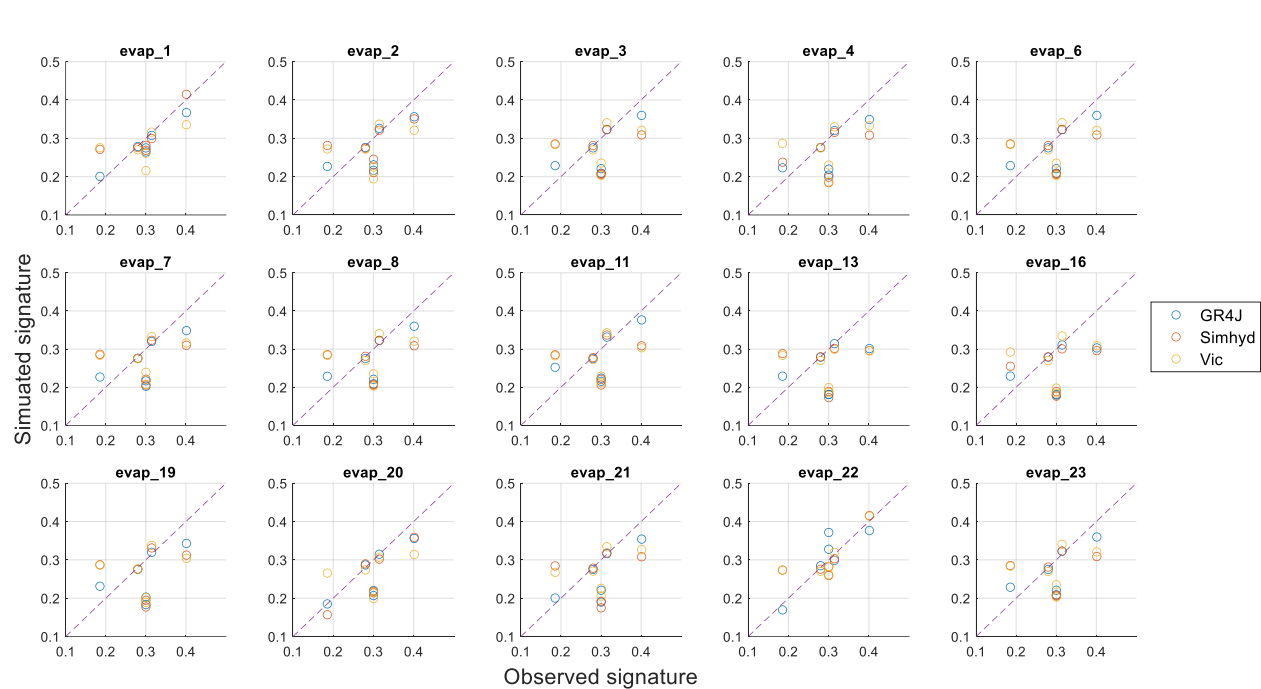

100

Figure S4.2. Interannual variability: observed vs. simulated AET across all equations and models. Annual signature, expressed as the coefficient of variation of annual AET.

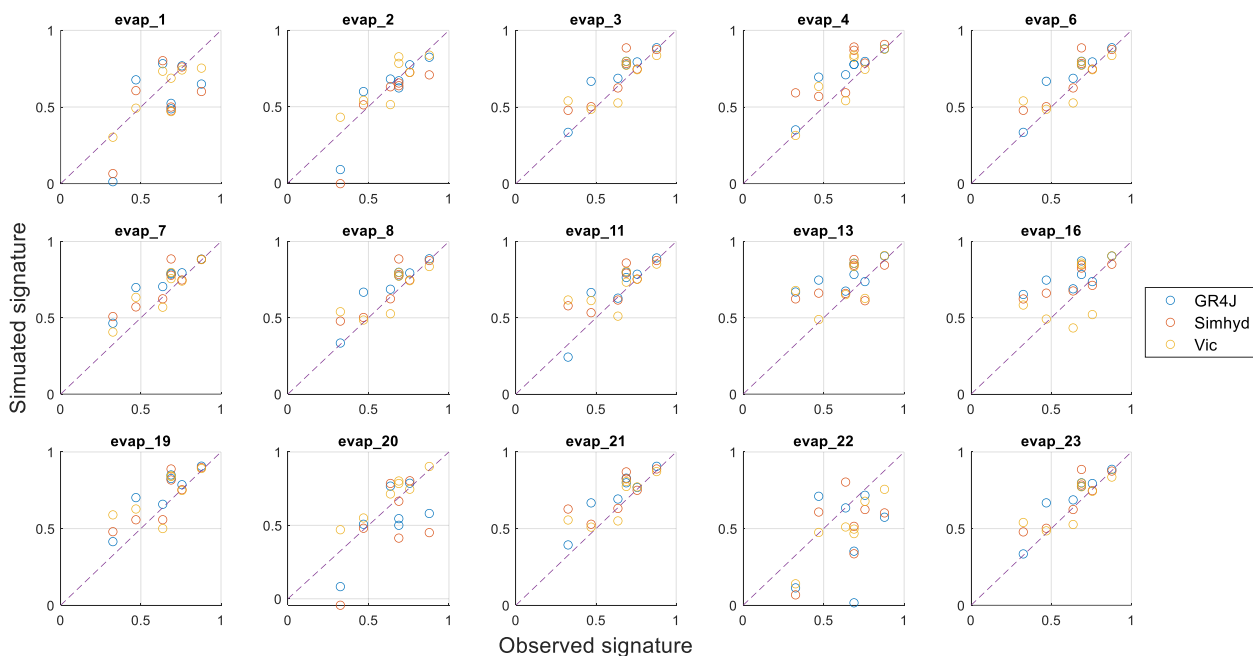

105 **Figure S4.3. Periodicity: observed vs. simulated AET across all equations and models. Seasonal signature, quantifying the tendency for AET variation to recur with the seasonal cycle (12 month period), calculated as the lag-12 autocorrelation of monthly AET.**

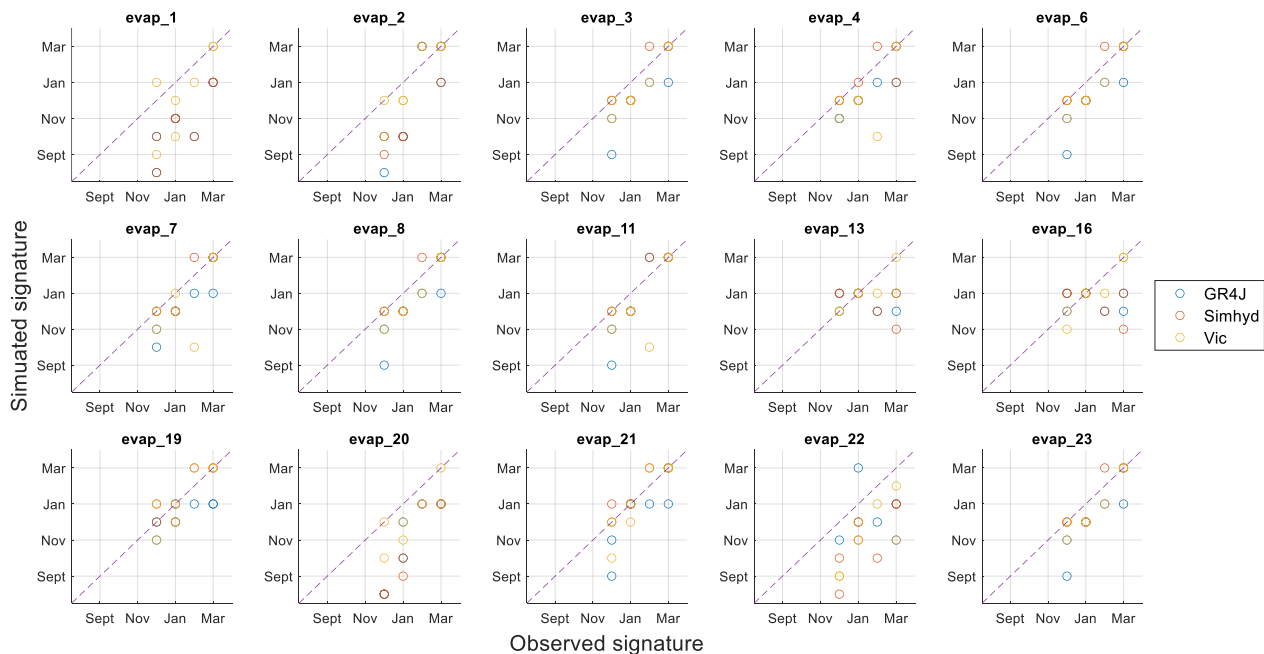

**Figure S4.4. Seasonal peak timing: observed vs. simulated AET across all equations and models. Seasonal signature, determined from monthly timestep data by examining the median AET for each of the 12 calendar months and identifying the month with the maximum median AET.**

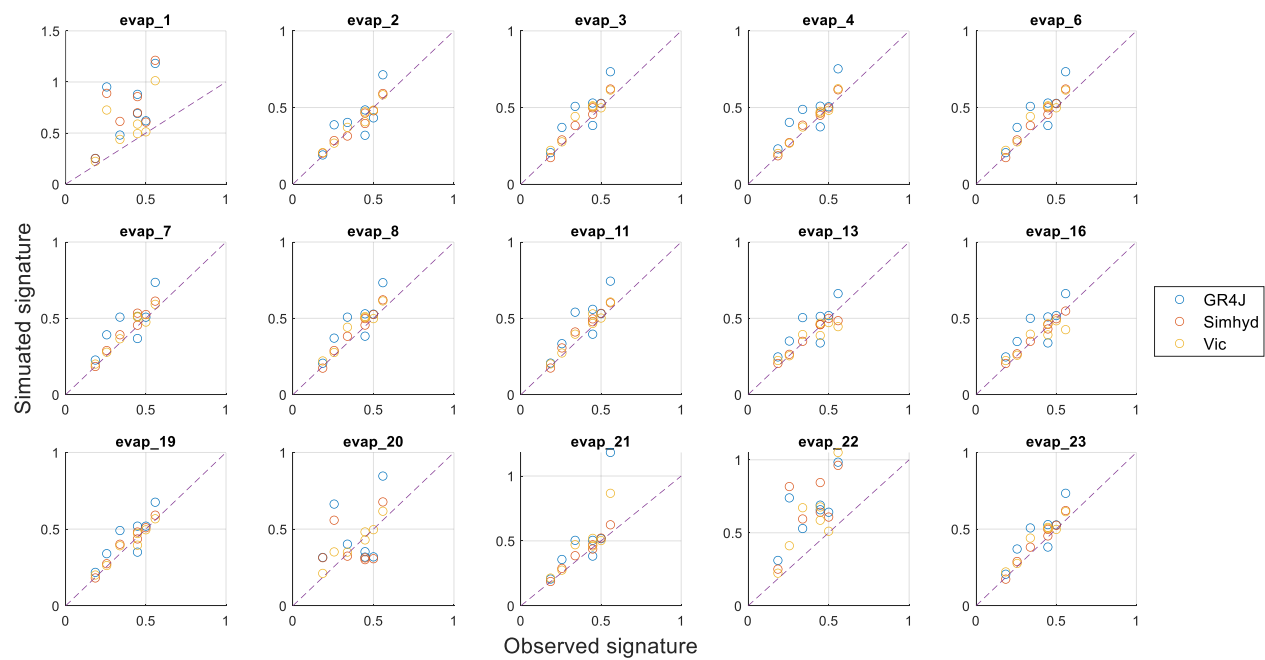

**Figure S4.5. Monthly variability: observed vs. simulated AET across all equations and models. Monthly signature.**



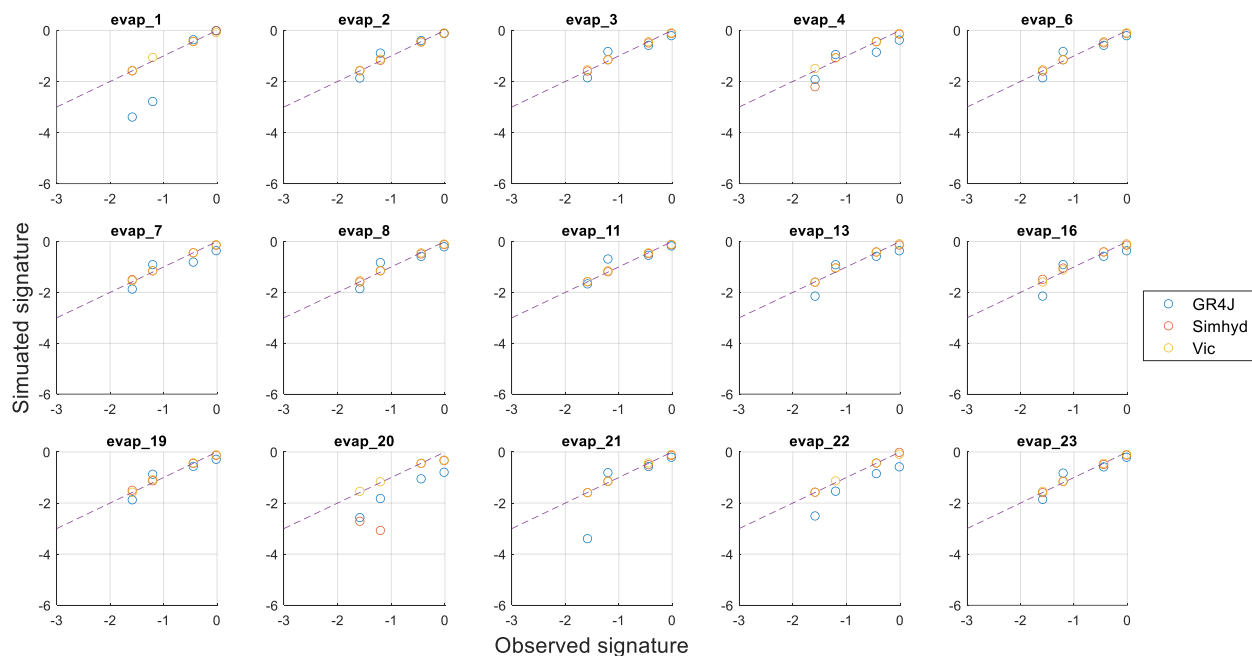

**Figure S4.6. Water stress: observed vs. simulated AET across all equations and models. Monthly water stress signature, defined as the difference between average monthly PET and average monthly AET, divided by the average monthly PET. Higher values of this water stress signature indicate less rainfall and/or high PET.**

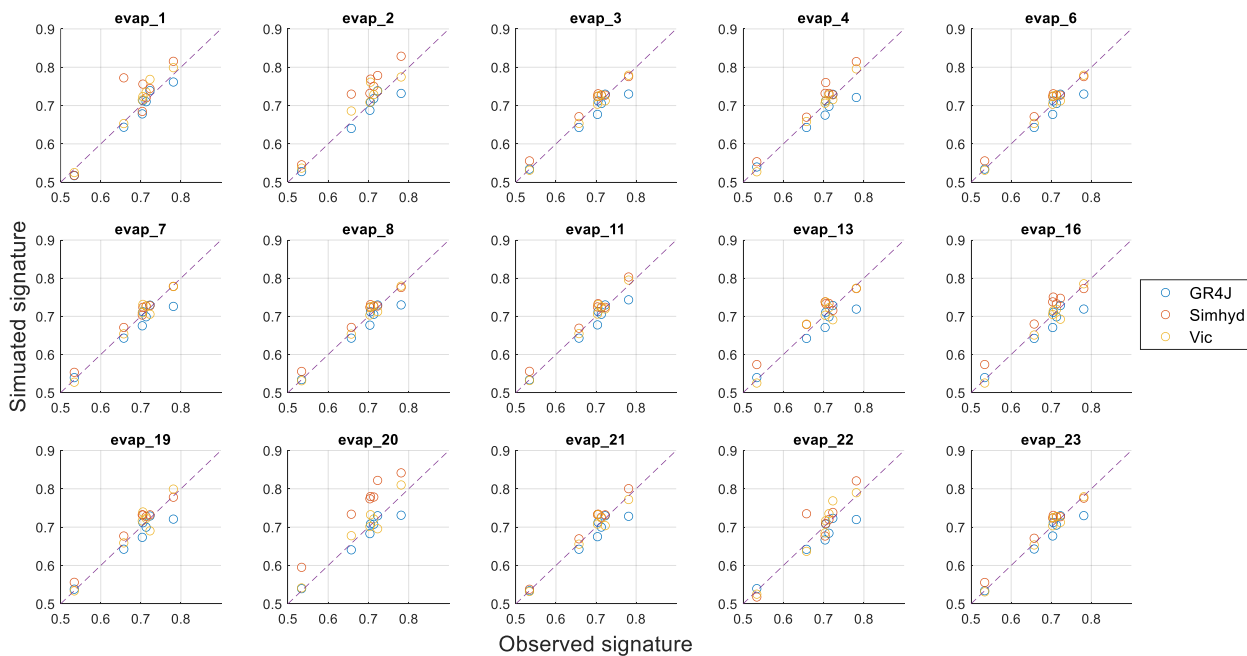



**Figure S4.7. Index of AET responsiveness to a rainfall event: observed vs. simulated AET across all equations and models. Event scale signature, calculated by selecting rainfall events greater than a threshold, identify the maximum daily AET value after the given rainfall event, up to a certain window duration (in days) after that event. Then a standard linear correlation equation is applied to the anomalies of these ordered pairs of numbers.**

**S5. Split sample test, calibration and evaluation dates**

| Catchment / Flux tower        | First calibration / second evaluation dates | Second calibration / first evaluation dates |
|-------------------------------|---------------------------------------------|---------------------------------------------|
| <b>407221 - Wombat Forest</b> | 21-Jan-2010 → 09-Feb-2015                   | 09-Feb-2015 → 28-Feb-2020                   |
| <b>405229 - Whroo</b>         | 02-Dec-2011 → 16-Dec-2016                   | 16-Dec-2016 → 31-Dec-2021                   |
| <b>G8150180 - Litchfield</b>  | 24-Jun-2015 → 26-Oct-2018                   | 26-Oct-2018 → 27-Feb-2022                   |
| <b>G8140011 - Dry River</b>   | 01-Jan-2014 → 29-Jan-2018                   | 30-Jan-2018 → 27-Feb-2022                   |
| <b>111007A - Robson Creek</b> | 02-Aug-2013 → 14-Nov-2017                   | 15-Nov-2017 → 27-Feb-2022                   |
| <b>617003 - Gingin</b>        | 21-Jan-2010 → 24-Sep-2015                   | 25-Sep-2015 → 28-May-2021                   |
| <b>401009 - Tumbarumba</b>    | 01-Jan-2008 → 31-Dec-2013                   | 31-Dec-2013 → 31-Dec-2019                   |

**S6. Evap\_19 calibrated parameter values**

| Evap_19              | GR4J |      | Simhyd |      | VIC  |      |
|----------------------|------|------|--------|------|------|------|
|                      | p1   | p2   | p1     | p2   | p1   | p2   |
| <b>Wombat Forest</b> | 0.60 | 0.24 | 0.83   | 0.24 | 0.54 | 0.16 |
| <b>Whroo</b>         | 0.51 | 0.88 | 0.80   | 0.45 | 0.84 | 1.00 |
| <b>Litchfield</b>    | 0.57 | 0.29 | 0.61   | 0.30 | 0.58 | 0.37 |
| <b>Dry River</b>     | 0.64 | 0.61 | 0.88   | 0.75 | 1.00 | 0.57 |
| <b>Robson Creek</b>  | 1.00 | 0.76 | 1.00   | 0.25 | 1.00 | 0.34 |
| <b>Gingin</b>        | 0.54 | 0.34 | 0.41   | 0.05 | 0.28 | 0.05 |
| <b>Tumbarumba</b>    | 0.59 | 0.05 | 0.87   | 0.17 | 0.79 | 0.23 |
